# Supplementary material
Source: publisher site journal article supplement (https://www.dovepress.com/article/175679)
Supplement: Supplementary file 1 [file get_supplementary_file.php]

**Supplementary Table 1** Primers for *mcr*-1 to *mcr*-5 used to detect the carriage of various plasmidic genes in the enrolled *Enterobacteriaceae* isolates with *in vitro* non-susceptibility to colistin

| **Types of genes encoding the *mcr* genes** | **Primers** | **Nucleotide sequence** | **Reference** |
| --- | --- | --- | --- |
| *mcr*-1 | CLR5-F | CGGTCAGTCCGTTTGTTC | *Lancet Infect. Dis* 2016;16:161–168 |
| CLR5-R | CTTGGTCGGTCTGTA GGG |
| *mcr*-2 | MCR2-F | TGGTACAGCCCCTTTATT | *Euro Surveill.* 2016;21(27) |
| MCR2-R | GCTTGAGATTGGGTTATGA |
| *mcr*-3 | MCR3-F | TTGGCACTGTATTTTGCATTT | *mBio.* 2017;8:e00543–17 |
| MCR3-R | TTAACGAAATTGGCTGGAACA |
| *mcr*-4 | Mcr-4 FW | ATTGGGATAGTCGCCTTTTT | *Euro Surveill.* 2017;22:30589 |
| Mcr-4 RV | TTACAGCCAGAATCATTATCA |
| *mcr*-5 | MCR5_fw | ATGCGGTTGTCTGCATTTATC | *J Antimicrob Chemother.* 2017;72:3317–3324 |
| MCR5_rev | TCATTGTGGTTGTCCTTTTCTG |

**Supplementary Table 2** Antimicrobial susceptibility (evaluated based on criteria of the Clinical and Laboratory Standards Institute, 2018, and European Committee on Antimicrobial Susceptibility Testing 2018a) of bloodstream isolates of *Escherichia coli*, *Klebsiella pneumoniae*, and other gram-negative bacteria, including isolates of non-typhoid *Salmonella* species from any site, fecal *Shigella* species, and *Neisseria gonorrhoeae* from the genitourinary system, collected from patients treated at 16 major teaching hospitals across Taiwan in 2017

| **Bacterial species (isolate no.), and antimicrobial agent tested** | **MIC (μg/mL)** | | | **% of indicated susceptibility** | | |
| --- | --- | --- | --- | --- | --- | --- |
| **Range** | **MIC50** | **MIC90** | **S** | **I** | **R** |
| ***Escherichia coli*** (686) |  |  |  |  |  |  |
| Amoxicillin-clavulanate | 1–>64 | 8 | 64 | 71.1 | 11.8 | 17.1 |
| Piperacillin-tazobactam | 0.5–>128 | 2 | 8 | 93.4 | 2.8 | 3.8 |
| Ceftolozane-tazobactam | 0.12–>64 | 0.25 | 1 | 94.3 | 2.2 | 3.5 |
| Ceftazidime-avibactam | ≤0.06–>64 | 0.12 | 0.25 | 99.9a | NA | 0.1a |
| Cefoxitin | ≤0.12–>64 | 8 | >64 | 72.3 | 9.2 | 18.5 |
| Cefixime | ≤0.12–>64 | 0.5 | >64 | 66.9 | 2.0 | 31.0 |
| Ceftriaxone | ≤0.12–>64 | ≤0.12 | >64 | 69.0 | 0.4 | 30.6 |
| Ceftazidime | ≤0.12–>256 | 0.25 | 32 | 74.5 | 5.1 | 20.4 |
| Cefepime | ≤0.12–>64 | ≤0.12 | 64 | 78.0 | 7.0 | 15.0 |
| Ertapenem | ≤0.06–>64 | ≤0.06 | 0.12 | 98.0 | 0.7 | 1.3 |
| Imipenem | ≤0.06–16 | 0.12 | 0.25 | 99.7 | 0 | 0.3 |
| Meropenem | ≤0.06–64 | ≤0.06 | ≤0.06 | 99.7 | 0 | 0.3 |
| Doripenem | ≤0.06–64 | ≤0.06 | ≤0.06 | 99.7 | 0.1 | 0.1 |
| Ciprofloxacin | ≤0.06–>64 | 0.25 | 64 | 68.2/59.9a | 1.3/6.7a | 30.5/33.4a |
| Levofloxacin | ≤0.06–>64 | 0.25 | 16 | 69.2/63.8a | 0.6/4.4a | 30.2/31.8a |
| Moxifloxacin | ≤0.06–>64 | 0.25 | 32 | 52.8a | NA | 47.2a |
| Gentamicin | ≤0.12–>64 | 1 | 64 | 75.4 | 1.2 | 23.5 |
| Amikacin | 0.5–>64 | 2 | 8 | 99.4 | 0.1 | 0.4 |
| Trimethoprim-sulfamethoxazole | ≤0.12–>32 | 1 | >32 | 51.2 | NA | 48.8 |
| Tigecycline | ≤0.12–8 | 0.25 | 0.25 | 99.9a | 0a | 0.1a |
| Colistin | ≤0.12–8 | 0.25 | 0.25 | 98.8 | NA | 1.2 |
|  |  |  |  |  |  |  |
| ***Klebsiella pneumoniae*** (673) |  |  |  |  |  |  |
| Amoxicillin-clavulanate | 0.5–>64 | 2 | 64 | 71.8 | 3.6 | 24.7 |
| Piperacillin-tazobactam | ≤0.06–>128 | 4 | >128 | 81.9 | 3.4 | 14.7 |
| Ceftolozane-tazobactam | ≤0.06–>64 | 0.5 | 64 | 84.1/80.7a | 1.2/NA | 14.7/19.1a |
| Ceftazidime-avibactam | ≤0.06–>64 | 0.12 | 1 | 99.1a | NA | 0.9a |
| Cefoxitin | ≤0.12–>64 | 4 | >64 | 71.9 | 3.0 | 25.1 |
| Cefixime | ≤0.12–>64 | ≤0.12 | >64 | 71.0 | 0.7 | 28.2 |
| Ceftriaxone | ≤0.12–>64 | ≤0.12 | >64 | 75.9 | 1.9 | 22.1 |
| Ceftazidime | ≤0.12–>256 | 0.25 | 256 | 73.7 | 3.4 | 22.9 |
| Cefepime | ≤0.12–>64 | ≤0.12 | 32 | 82.8 | 2.5 | 14.7 |
| Ertapenem | ≤0.06–>64 | ≤0.06 | 1 | 89.5 | 3.6 | 7.0 |
| Imipenem | ≤0.06–>64 | 0.25 | 1 | 93.0 | 1.9 | 5.1 |
| Meropenem | ≤0.06–>64 | ≤0.06 | 0.12 | 94.5 | 0.6 | 4.9 |
| Doripenem | ≤0.06–>64 | ≤0.06 | 0.25 | 94.5 | 0.3 | 5.2 |
| Ciprofloxacin | ≤0.06–>64 | ≤0.06 | 64 | 79.5/66.4a | 1.8/6.7a | 18.7/26.9a |
| Levofloxacin | ≤0.06–>64 | ≤0.06 | 32 | 81.0/69.7a | 2.2/9.5a | 16.8/20.8a |
| Moxifloxacin | ≤0.06–>64 | 0.12 | 32 | 64.0a | NAa | 36.0a |
| Gentamicin | ≤0.12–>64 | 0.25 | 32 | 80.7 | 1.9 | 17.4 |
| Amikacin | ≤0.12–>64 | 1 | 2 | 96.9 | 0 | 3.1 |
| Trimethoprim-sulfamethoxazole | ≤0.12–>32 | 0.25 | >32 | 71.0 | NA | 29.0 |
| Tigecycline | ≤0.12–16 | 0.5 | 1 | 94.7a | 4.0a | 1.3a |
| Colistin | ≤0.12–>64 | 0.25 | 0.5 | 97.6 | NA | 2.4 |
|  |  |  |  |  |  |  |
| **Non-typhoid *Salmonella* spp.** (221) |  |  |  |  |  |  |
| Ampicillin | 0.5–>64 | 4 | >64 | 51.6 | 1.8 | 46.6 |
| Amoxicillin-clavulanate | 0.5–>64 | 2 | 64 | 81.0 | 6.8 | 12.2 |
| Piperacillin-tazobactam | ≤0.06–>128 | 4 | 8 | 95.5 | 2.3 | 2.3 |
| Ceftolozane-tazobactam | 0.25–>64 | 0.5 | 1 | 96.4 | 1.4 | 2.3 |
| Ceftazidime-avibactam | ≤0.06–1 | 0.25 | 0.5 | 100a | NA | 0a |
| Cefixime | ≤0.12–>64 | ≤0.12 | >64 | 87.3 | 0.5 | 12.2 |
| Ceftriaxone | ≤0.12–64 | ≤0.12 | 1 | 92.3 | 1.8 | 5.9 |
| Ceftazidime | ≤0.12–>256 | 0.25 | 16 | 88.2 | 1.4 | 10.4 |
| Cefepime | ≤0.12–2 | ≤0.12 | ≤0.12 | 100 | 0 | 0 |
| Ertapenem | ≤0.06–0.25 | ≤0.06 | ≤0.06 | 100 | 0 | 0 |
| Imipenem | 0.12–0.5 | 0.25 | 0.25 | 100 | 0 | 0 |
| Meropenem | ≤0.06–0.12 | ≤0.06 | ≤0.06 | 100 | 0 | 0 |
| Doripenem | ≤0.06–0.25 | ≤0.06 | ≤0.06 | 100 | 0 | 0 |
| Ciprofloxacin | ≤0.06–16 | ≤0.06 | 0.5 | 78.7/78.7a | 18.1/NAa | 3.2/21.3a |
| Levofloxacin | ≤0.06–16 | ≤0.06 | 1 | 78.7/89.6a | 10.9/8.6a | 10.4/1.8a |
| Moxifloxacin | ≤0.06–16 | 0.12 | 2 | 79.2a | NAa | 20.8a |
| Gentamicin | ≤0.12–>64 | 0.5 | 1 | 96.4 | 0.5 | 3.2 |
| Amikacin | 0.25–4 | 1 | 2 | 100 | 0 | 0 |
| Trimethoprim-Sulfamethoxazole | ≤0.12–>32 | ≤0.12 | >32 | 74.2 | NA | 25.8 |
| Tigecycline | ≤0.12–1 | 0.25 | 0.5 | 100a | 0a | 0a |
| Colistin | 0.25–16 | 2 | 4 | 53.8 | NA | 46.2 |
|  |  |  |  |  |  |  |
| ***Shigella* spp.** (21) |  |  |  |  |  |  |
| Ampicillin | 1–>64 | >64 | >64 | 38.1 | 0 | 61.9 |
| Amoxicillin-clavulanate | 2–16 | 16 | 16 | 38.1 | 61.9 | 0 |
| Piperacillin-tazobactam | 0.25–8 | 4 | 4 | 100 | 0 | 0 |
| Ceftolozane-tazobactam | 0.12–0.25 | 0.12 | 0.25 | 100 | 0 | 0 |
| Ceftazidime-avibactam | ≤0.06–0.25 | ≤0.06 | 0.12 | 100a | NAa | 0a |
| Cefoxitin | 2–8 | 4 | 8 | 100 | 0 | 0 |
| Cefixime | ≤0.12–1 | 0.25 | 0.5 | 100 | 0 | 0 |
| Ceftriaxone | ≤0.12 | ≤0.12 | ≤0.12 | 100 | 0 | 0 |
| Ceftazidime | ≤0.12–0.5 | ≤0.12 | ≤0.12 | 100 | 0 | 0 |
| Cefepime | ≤0.12–0.5 | 0.5 | 0.5 | 100 | 0 | 0 |
| Ertapenem | ≤0.06 | ≤0.06 | ≤0.06 | 100 | 0 | 0 |
| Imipenem | 0.12–0.5 | 0.25 | 0.25 | 100 | 0 | 0 |
| Meropenem | ≤0.06 | ≤0.06 | ≤0.06 | 100 | 0 | 0 |
| Doripenem | ≤0.06–0.12 | ≤0.06 | ≤0.06 | 100 | 0 | 0 |
| Ciprofloxacin | ≤0.06–16 | ≤0.06 | 16 | 61.9 | 0 | 38.1 |
| Levofloxacin | ≤0.06–8 | ≤0.06 | 8 | 61.9 | 19.0 | 19.0 |
| Moxifloxacin | ≤0.06–8 | ≤0.06 | 8 | 61.9a | NAa | 38.1a |
| Gentamicin | 0.5–2 | 1 | 2 | 100 | 0 | 0 |
| Amikacin | 1–8 | 2 | 4 | 100 | 0 | 0 |
| Trimethoprim-Sulfamethoxazole | ≤0.12–>32 | 1 | >32 | 61.9 | NA | 38.1 |
| Azithromycin-*Shigella flexneri* (17) | 1–>64 | 4 | >64 | 70.6 | NA | 29.4 |
| Azithromycin-*Shigella sonnei* (4) | 8–128 | 8 | 128 | 75 | NA | 25 |
| Tigecycline | ≤0.12–0.25 | ≤0.12 | ≤0.12 | 100a | 0a | 0a |
| Colistin | ≤0.12–0.25 | 0.25 | 0.25 | 100 | NA | 0 |
|  |  |  |  |  |  |  |
| ***Neisseria gonorrhoeae***(129) |  |  |  |  |  |  |
| Ceftriaxone | ≤0.015–0.25 | ≤0.015 | 0.06 | 100/99.2a | NA/NAa | NA/0.8a |
| Cefotaxime | ≤0.03–0.5 | 0.06 | 0.25 | 100/89.1a | NA/NAa | NA/10.9a |
| Cefixime | ≤0.03–0.5 | 0.06 | 0.12 | 96.1/89.1a | NA/NAa | NA/10.9a |
| Cefpodoxime | ≤0.03–2 | 0.25 | 0.5 | 89.9 | NA | NA |
| Ciprofloxacin | ≤0.008–128 | 4 | 16 | 2.3 | 0 | 97.7 |
| Spectinomycin | 16–64 | 32 | 32 | 97.7 | 2.3 | 0 |
| Doxycycline | 0.25–32 | 8 | 16 | NA | NA | NA |
| Tigecycline | 0.06–1 | 0.25 | 0.5 | NA | NA | NA |
| Azithromycin | ≤0.03–>32 | 0.25 | 0.5 | 96.9/60.5a | NA/31.0a | 3.1/8.5a |

NA, non-applicable; MIC, minimum inhibitory concentration; S, susceptible; I, intermediate; R, resistant
